# Supplementary material for: Retrieval of aerosol composition directly from satellite and ground-based measurements
Source: Copernicus journal article supplement (doi:10.5194/acp-2019-208), 2019-03-19
Supplement: Supplementary file 1 [file acp-2019-208-supplement.pdf]

Supplement:

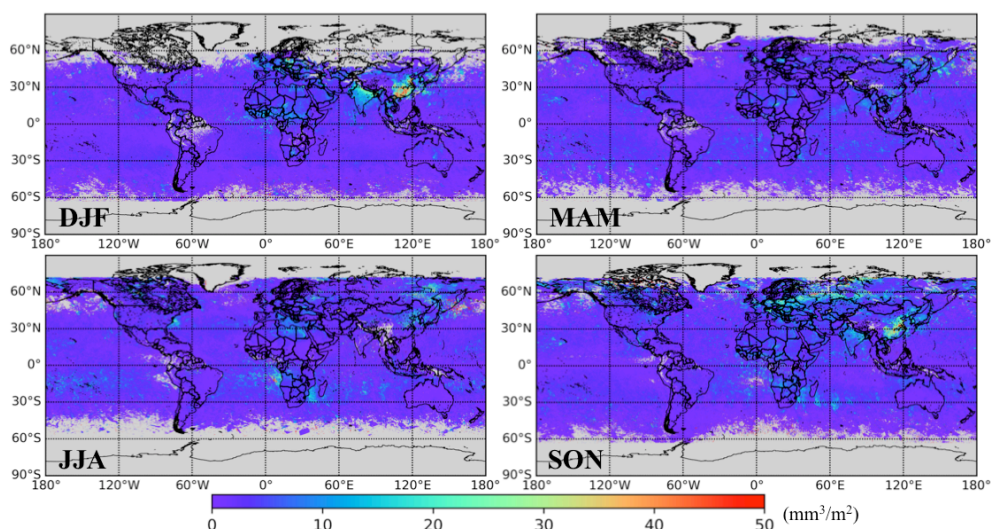

**Figure S1.** Seasonal variability of fine mode aerosol water content (FAWC) volume concentration ( $\text{mm}^3/\text{m}^2$ ) over the globe in 2008 as retrieved by GRASP/Composition algorithm from POLDER/PARASOL satellite observations.

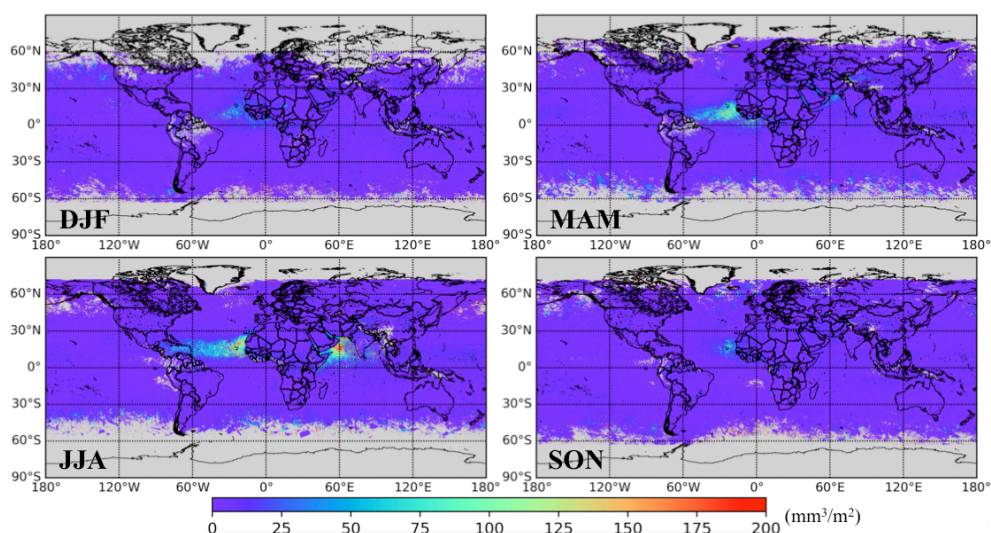

**Figure S2.** Same as Fig. S1, but for coarse mode aerosol water content (CAWC)

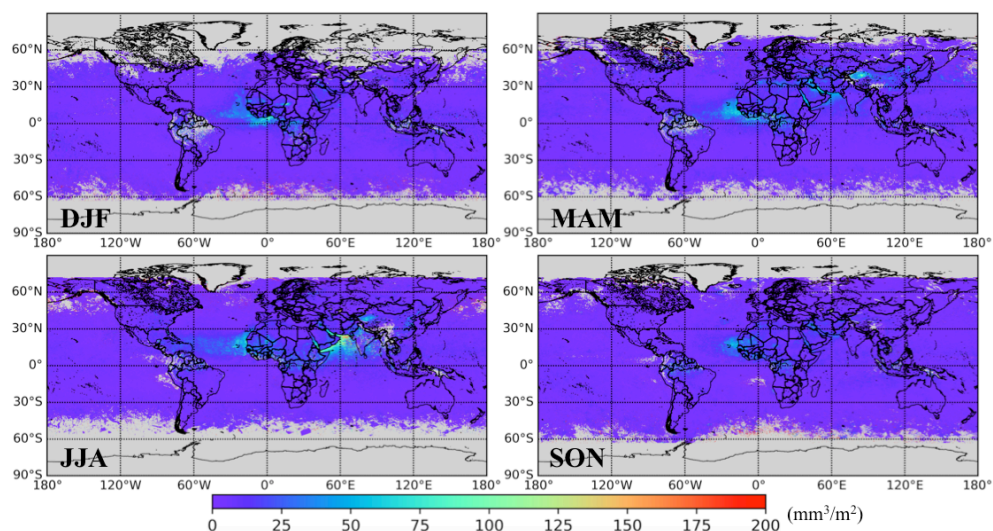

**Figure S3.** Same as Fig. S1, but for coarse mode non-absorbing soluble (CNAS)

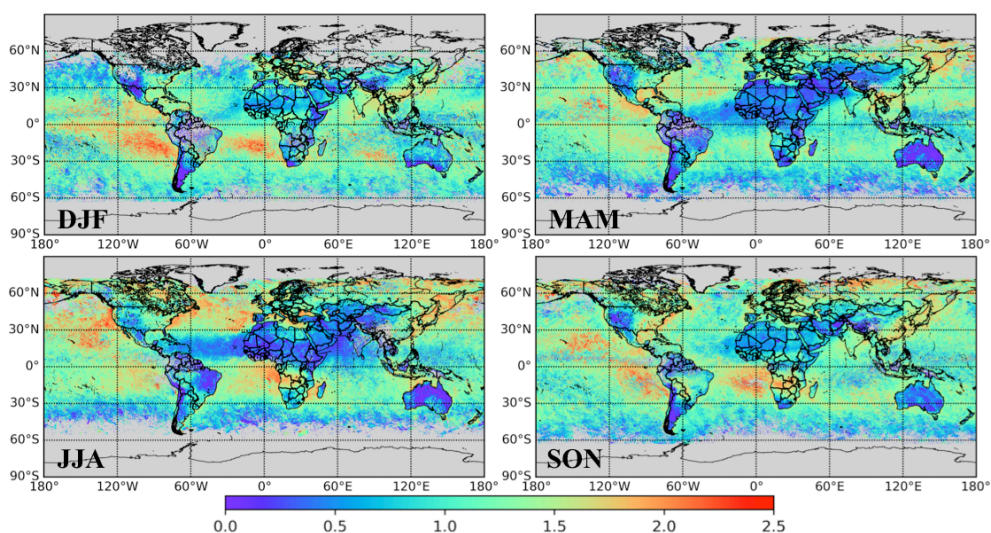

**Figure S4.** Same as Fig. S1, but for Ångström Exponent
